# Supplementary material for: Enhanced electrochemical performance of a lead–acid battery by a surface modified negative grid with multiwall carbon nanotube coating
Source: Royal Society of Chemistry journal article supplement (doi:10.1039/c4ra17052k), 2015-01-01
Supplement: c4ra17052k1.pdf [file c4ra17052k1.pdf]

## Electronic Supplementary Information

### Enhanced electrochemical performance of lead-acid battery by surface modification with multiwall carbon nanotube coating of negative grid

M. Saravanan<sup>+</sup>, M. Ganesan, S. Ambalavanan<sup>\*</sup>

Electrochemical Energy System Group, CSIR-Central Electrochemical Research Institute,  
Karaikudi-630006, India

<sup>\*</sup> To whom correspondence should be addressed. [vananambu456@yahoo.co.in](mailto:vananambu456@yahoo.co.in) Tel.: +91-4565-224390; Fax: +91-4565-227779

<sup>+</sup> Present address: Flour Milling, Baking & Confectionery Technology Division, CSIR- Central Food Technological Research Institute, Mysore-570020, India

#### SEM & TEM images of CNT:

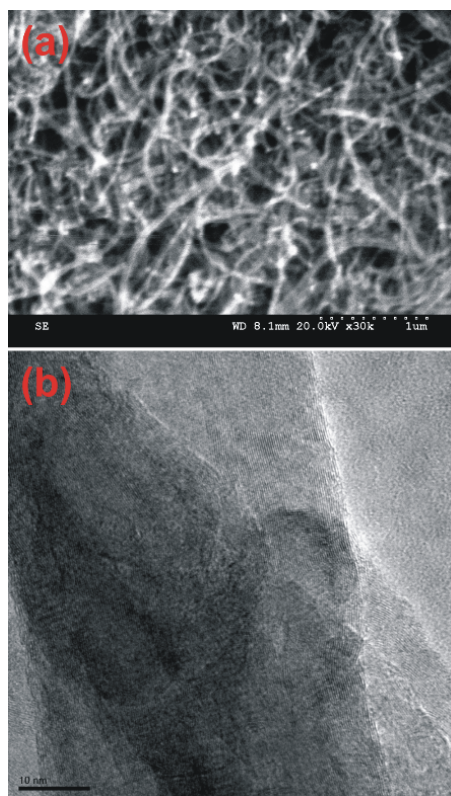

Figure S1: SEM and TEM images of CNT
